# Supplementary material for: Elevated Lead, Nickel, and Bismuth Levels in the Peritoneal Fluid of a Peritoneal Endometriosis Patient without Toxic Habits or Occupational Exposure following a Vegetarian Diet
Source: MDPI journal article supplement (doi:10.3390/toxics11121009), 2023-12-10
Supplement: s1 [file s1]

Table S1. Demographic, biochemical, and expositional data from the reference control group.

| Parameter                   | Reference control group |
|-----------------------------|-------------------------|
| Demographic data            |                         |
| Age (min-max)               | 13-43                   |
| BMI (min-max)               | 17-25                   |
| Sterile (%)                 | 10                      |
| Biochemical data            |                         |
| TSH (mUI/L) (min-max)       | 1.25-2.71               |
| CA125 (U/mL) (min-max)      | 2.60-24.6               |
| Expositional status         |                         |
| Current smoker (%)          | 10                      |
| Ex-smoker (%)               | 20                      |
| Occupationally exposed (%)  | 20                      |
| Environmentally exposed (%) | 0                       |
